# Supplementary material for: Facile synthesis of Bi2O3/BiOX mixed-phase for electrochemical detection of paracetamol
Source: Royal Society of Chemistry journal article supplement (doi:10.1039/d6ra01611a), 2026-03-31
Supplement: d6ra01611a1.pdf [file d6ra01611a1.pdf]

## Facile Synthesis of $\text{Bi}_2\text{O}_3/\text{BiOX}$ mixed-phase for electrochemical detection of paracetamol

**Raamisa Anjum<sup>a,b</sup>, Md. Hasanuzzaman<sup>b</sup>, Muhammad Shahriar Bashar<sup>c</sup>, Juliya Khanam<sup>b</sup>,  
Umme Sarmeen Akhtar<sup>b</sup>, A. M. Sarwaruddin Chowdhury<sup>c</sup>, Samina Ahmed<sup>b\*</sup>, Sumaya  
Farhana Kabir<sup>a\*</sup>, Md. Sahadat Hossain<sup>b\*</sup>**

<sup>a</sup>Department of Applied Chemistry and Chemical Engineering, University of Dhaka, Dhaka - 1000, Bangladesh

<sup>b</sup>Institute of Glass & Ceramic Research and Testing, Bangladesh Council of Scientific and Industrial Research (BCSIR), Dhaka 1205, Bangladesh

<sup>c</sup>Institute of Energy Research & Development, Bangladesh Council of Scientific and Industrial Research (BCSIR), Dhaka, Bangladesh

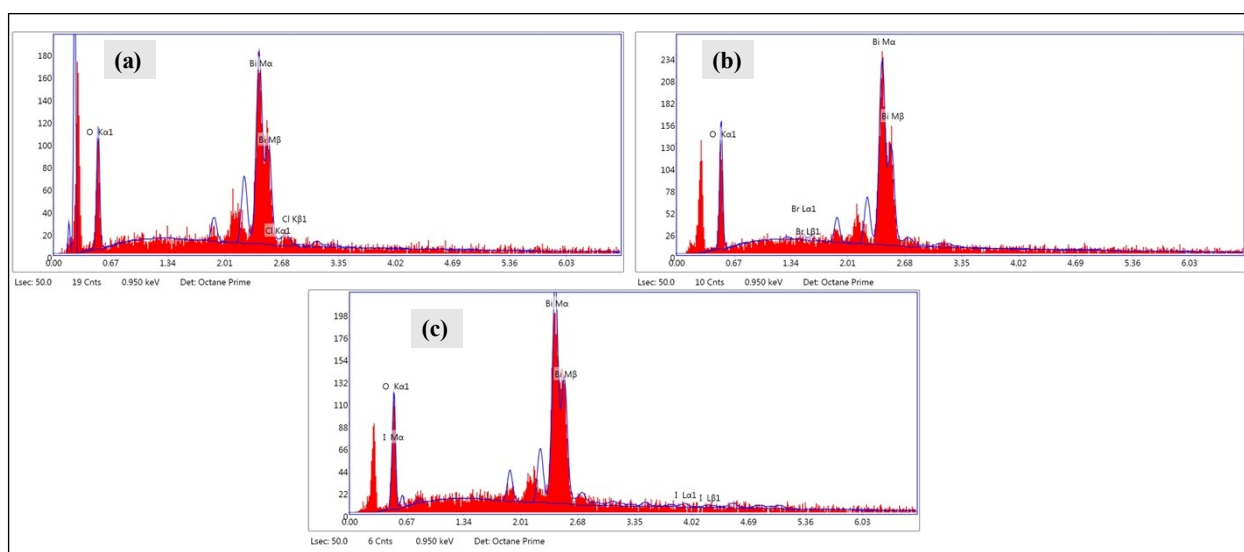

Fig. S1: EDS analysis of (a)  $\text{Bi}_2\text{O}_3/\text{BiOCl}$ , (b)  $\text{Bi}_2\text{O}_3/\text{BiOBr}$  and (c)  $\text{Bi}_2\text{O}_3/\text{BiOI}$ .

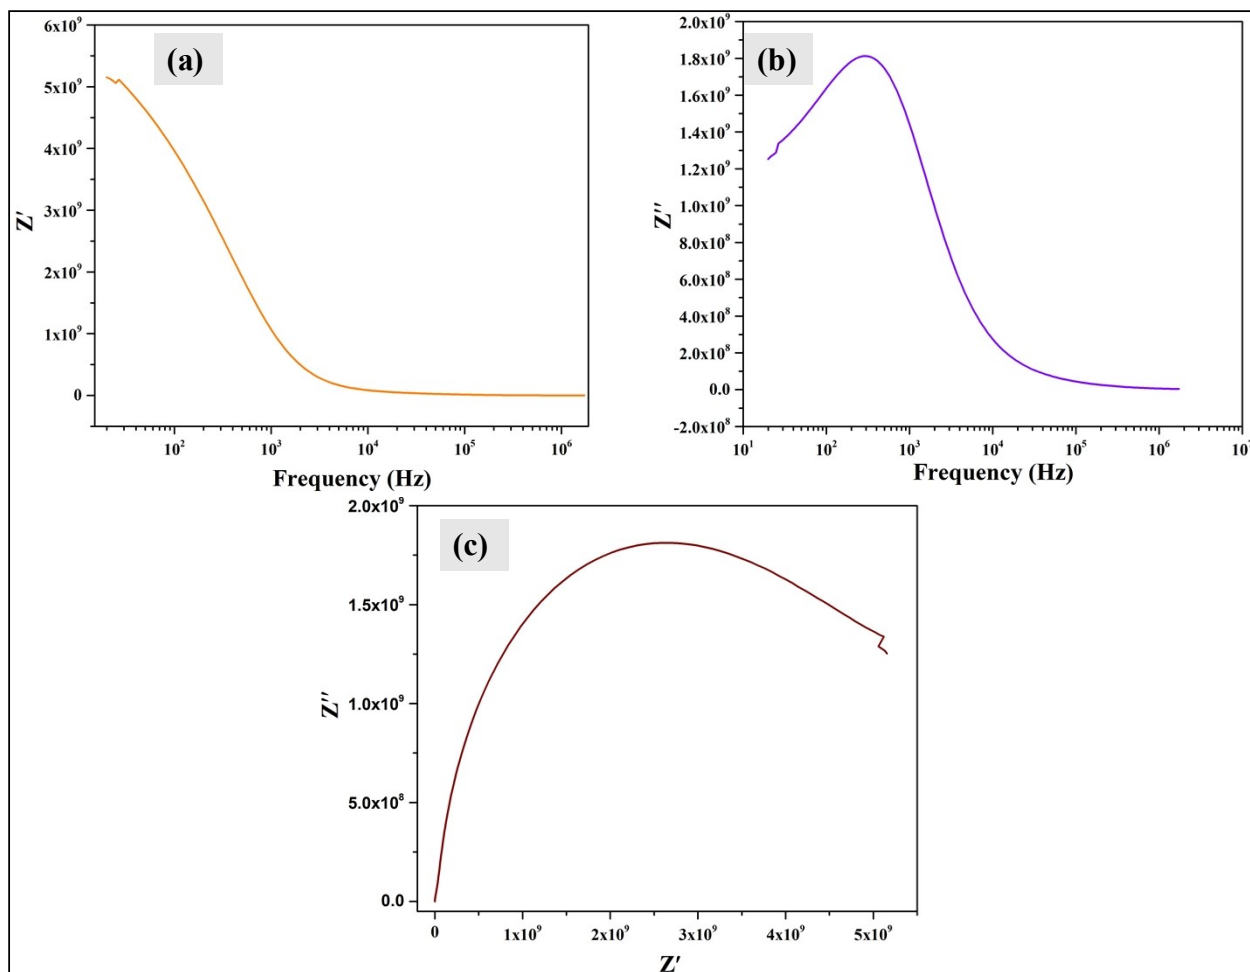

Fig. S2: (a) Real part,  $Z'$  with (b) imaginary part,  $Z''$  of impedance and (c) Nyquist plot of the  $\text{Bi}_2\text{O}_3/\text{BiOCl}$  sample.

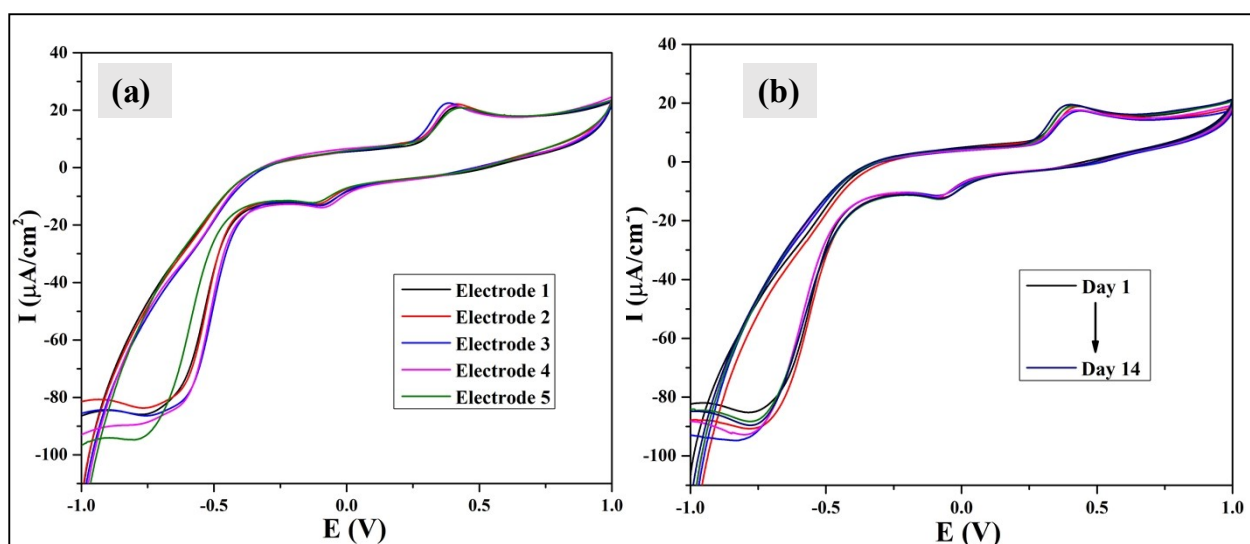

Fig. S3: DPV of  $\text{Bi}_2\text{O}_3/\text{BiOCl}$  electrode for (a) reproducibility and (b) stability analysis.
